# Supplementary material for: Dry-Hop Creep Potential of Various Saccharomyces Yeast Species and Strains
Source: MDPI journal article supplement (doi:10.3390/fermentation7020066), 2021-04-29
Supplement: s1 [file s1]

## Supplementary Information

**Table S1.** Malt analysis provided by Admiral Maltings. Moisture content, friability, extract, and protein contents are reported as percentages (%), color is reported as SRM, beta-glucan and FAN are reported as mg/L, diastatic power is reported in degrees Linter (°L), and alpha-amylase is reported in dextrinizing units (D.U.). Some values were not reported by supplier for all malts (---).

| Malt/Batch No.          | Pils   |        | It's the Chit | Kilnsmith |
|-------------------------|--------|--------|---------------|-----------|
| Batch No.               | 20-099 | 20-106 | 20-085        | 20-095    |
| <i>Moisture Content</i> | 4.6    | 4.2    | 4.0           | 3.2       |
| <i>Friability</i>       | 89.3   | 91.2   | ---           | ---       |
| <i>Extract (FGDB)</i>   | 81.6   | 82.1   | 78.5          | 77.0      |
| <i>Color</i>            | 1.66   | 1.75   | 1.25          | 90.0      |
| <i>Beta-Glucan</i>      | 242    | 164    | 1100          | ---       |
| <i>Soluble Protein</i>  | 4.49   | 4.53   | 27.0          | ---       |
| <i>Total Protein</i>    | 10.7   | 10.6   | 10.8          | ---       |
| <i>FAN</i>              | 186    | 189    | 110           | ---       |
| <i>Diastatic Power</i>  | 127    | 143    | 50            | ---       |
| <i>Alpha Amylase</i>    | 44.6   | 52.5   | 5.0           | ---       |
